# Supplementary material for: Impaired Activity of Blood Coagulant Factor XIII in Patients with Necrotizing Enterocolitis
Source: PubMed Central journal article supplement (PMC4642514; doi:10.1038/srep13119), 2015-08-17
Supplement: srep13119-s1.pdf [file srep13119-s1.pdf]

**Supplemental data for:**

**Impaired Activity of Blood Coagulant Factor XIII in Patients with  
Necrotizing Enterocolitis**

Guo-Zhong Tao<sup>1</sup>, Bo Liu<sup>1</sup>, Rong Zhang<sup>1</sup>, Gigi Liu<sup>1,2</sup>, Fizan Abdullah<sup>2</sup>, Mary Cay Harris<sup>3</sup>,  
Mary Brandt<sup>4</sup>, Richard Ehrenkranz<sup>5</sup>, Corinna Bowers<sup>6,7</sup>, Camilia R. Martin<sup>8</sup>,  
R. Lawrence Moss<sup>6,7</sup> and Karl G. Sylvester<sup>1,9, 10</sup>

<sup>1</sup>Department of Surgery, Stanford University School of Medicine, Stanford, USA

<sup>2</sup>Department of Surgery, Johns Hopkins University School of Medicine, Baltimore, USA

<sup>3</sup>Department of Pediatrics, Children's Hospital of Philadelphia, Philadelphia, USA

<sup>4</sup>Department of Surgery, Texas Children's Hospital, Baylor College of Medicine, Houston, USA

<sup>5</sup>Department of Pediatrics, Yale University School of Medicine, New Haven, USA

<sup>6</sup>Division of Pediatric Surgery, Nationwide Children's Hospital, Columbus, USA

<sup>7</sup>Department of Surgery, Ohio State College of Medicine, Columbus, USA

<sup>8</sup>Department of Neonatology, Beth Israel Deaconess Medical Center, Boston, USA

<sup>9</sup>Lucile Packard Children's Hospital Stanford, Stanford, USA

<sup>10</sup> Center for Fetal and Maternal Health, Stanford Children's Health, Stanford, USA

**Corresponding Author:**

Karl G. Sylvester, M.D.

Department of Surgery, Division of Pediatric Surgery

Stanford University School of Medicine

Hagey Laboratory for Regenerative Medicine

257 Campus Drive

Stanford, CA 94305-5148

Email: [sylvester@stanford.edu](mailto:sylvester@stanford.edu)

Phone: (650) 804-0597

Fax: (650) 725-557

Supplemental Table-1. Bell's stage and platelet count for enrolled patients with NEC

|                     | Modified Bell's staging |    |     |     |      |      | Platelet count<br>(~ x1000 per $\mu$ l) |
|---------------------|-------------------------|----|-----|-----|------|------|-----------------------------------------|
|                     | IA                      | IB | IIA | IIB | IIIA | IIIB | Mean $\pm$ SD                           |
| <b>NEC-M</b> (n=20) | 3                       | 6  | 7   | 4   | 0    | 0    | 307 $\pm$ 142                           |
| <b>NEC-S</b> (n=20) | 0                       | 0  | 0   | 0   | 3    | 17   | 190 $\pm$ 100*                          |

(Student *t*-test, \*p=0.04 compared to NEC-M cohort)

Supplemental Table-2. Blood culture result for preterm infants enrolled in this study

|                       |                                   | <b>NEC</b> | <b>Sepsis</b> |
|-----------------------|-----------------------------------|------------|---------------|
|                       |                                   | N=40       | N=20          |
| <b>Culture result</b> |                                   |            |               |
|                       | Positive                          | 3          | 4             |
|                       | Negative                          | 32         | 7             |
|                       | Unknown**                         | 5          | 9             |
| <b>Microorganism</b>  |                                   |            |               |
|                       | <i>Candida</i>                    | 1          | 0             |
|                       | <i>Enterococcus faecalis</i>      | 1          | 0             |
|                       | <i>Staphylococcus aureus</i>      | 0          | 1             |
|                       | <i>Staphylococcus epidermidis</i> | 1          | 3             |

(\*\*including pending/uncertain data for NEC or clinical sepsis)

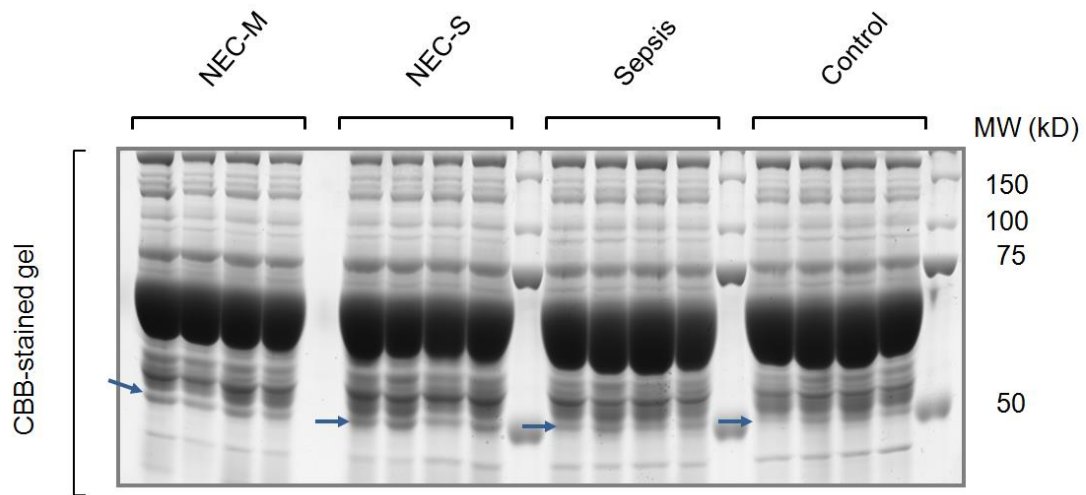

*Supplemental Fig 1. Comparison of plasma abundant proteins by SDS-PAGE*

Pooled plasma samples from indicated newborn cohorts were separated by one-dimensional SDS-PAGE and visualized by staining of coomassie brilliant blue. Note that protein bands indicated by arrows were altered among the groups and excised for MS/MS assay.

A.

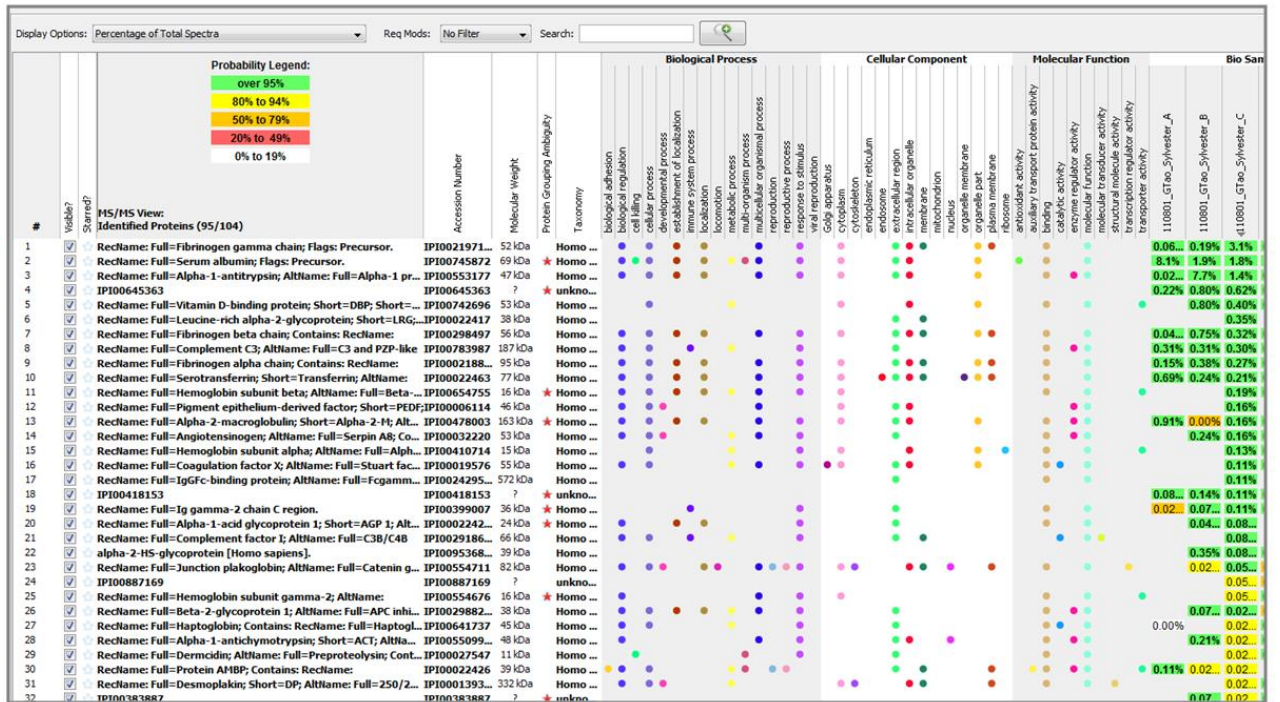

B.

IP100219713 (100%), 51,513.3 Da  
 RecName: Full=Fibrinogen gamma chain; Flags: Precursor.  
 30 exclusive unique peptides, 48 exclusive unique spectra, 117 total spectra, 309/453 amino acids (68% coverage)

```

MSWSLHPRNL ILYFYALLFL SSTCVAYVAT RDNCCILDER FGSYCPPTCG IADFLSTYQT
KVDKDLQSL E DILHQVENKT SEVKKLIKAI QLTYNPDES! KPNMIDAATL KSRKMLEEIM
KYEASILTHD SSIRYLQEIY NSNNQKLVNL KEKVAQLDAQ CQEPCKDITVQ IHDITGKDCQ
DIANKGAKQS GLFYIKPLKA NQQFLVYCEI DGSGNGWTVF QKRLDGSVDF KKNWIPQYKEG
FGHLSPTGTT EFWLGNKIH LISTSQAIPY ALRVELEDWN GRTSTADYAM FKVGVEADKY
RLTYAYFAGG DAGDAFDGFD FGD D P S D K F F TSHNGMQFST WDNDNDKFEF NCAEQDGS GW
WMNKCHAGHL NGVYYQGTTY SKASTPNLYD NGIIWATWKT RWYSMKKTTM KIPFNRLTI
GEGQQHLLG AKQVRPEHPA ETEYDLSLYPE DDL
  
```

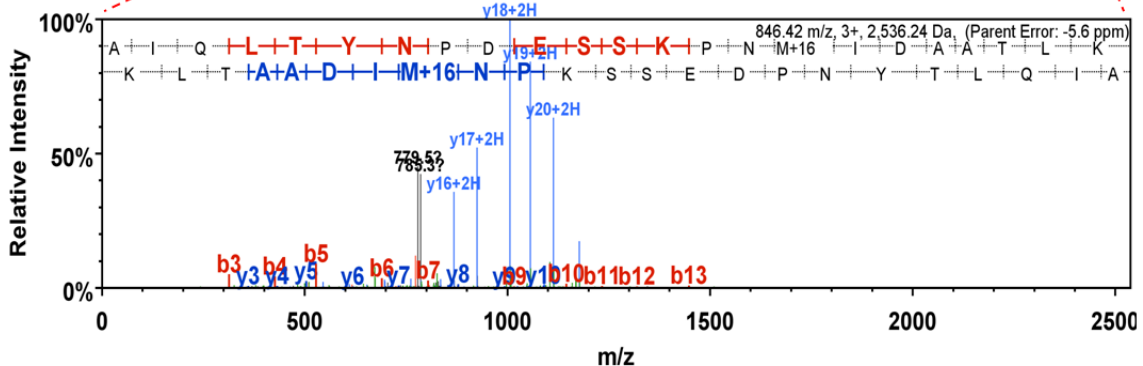

Supplemental Fig 2. Identification of the target protein by mass spectrometry

A) FGG as indicated by arrow was identified as the most likely candidate protein with the highest score. B) 68% of the full length FGG amino acid sequence (yellow highlight) was identified (upper), and spectra data from one peptide is shown as an example.

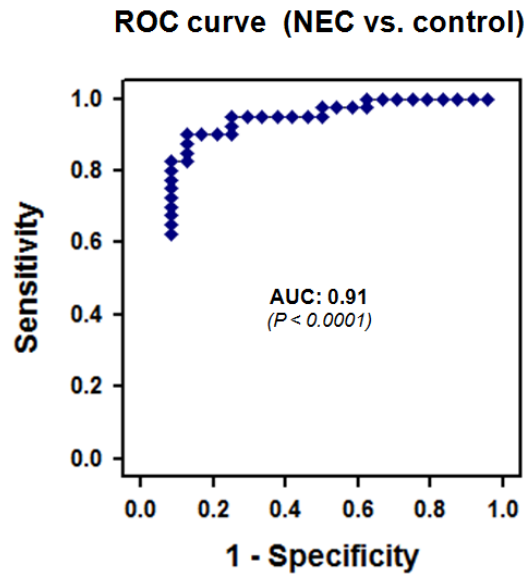

Supplemental Fig 3. Receiver-operating characteristic (ROC) curve analysis for NEC and control neonates

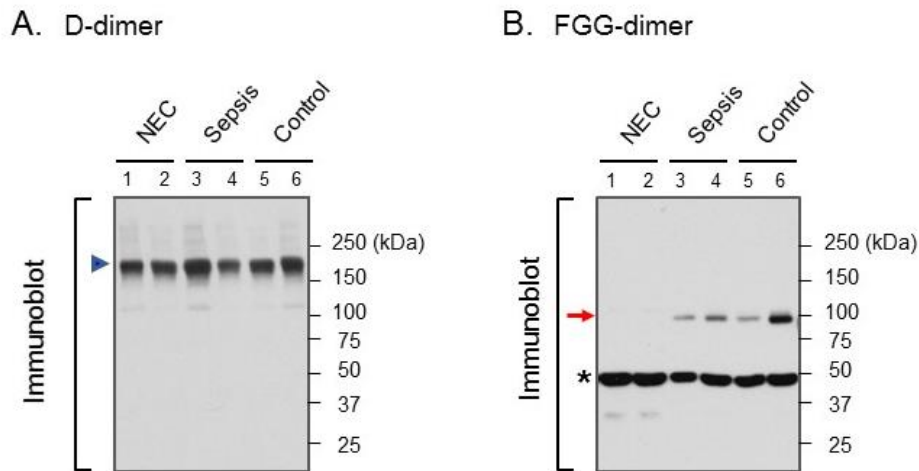

Supplemental Fig 4. FGG-dimer detection is different from D-dimer assay

Pooled plasma samples were subjected to immunoblot by D-dimer antibody after separation using non-reducing SDS-PAGE. A) D-dimer is detected at ~180kDa under non-reducing condition; but undetectable under reducing condition (not shown). Arrowhead is D-dimer protein band. B) The same plasma samples were analyzed by immunoblot using FGG monoclonal antibody and the ~100kDa protein band as indicated by the arrow is FGG-dimers. \*Indicated FGG-monomer. Note that FGG-dimer differs from D-dimer.

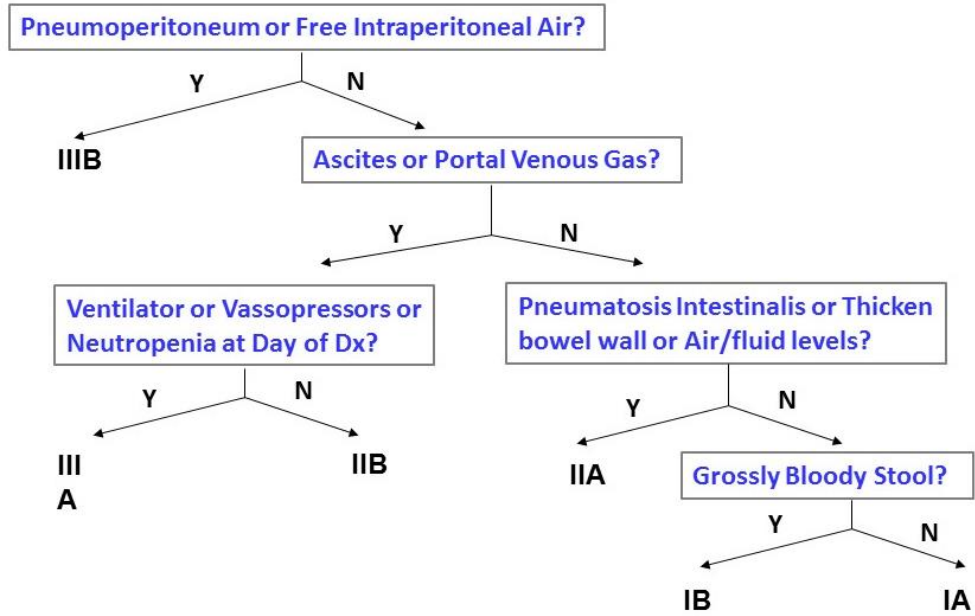

Supplemental Fig 5. NEC classification by Bell's staging decision tree
